# Supplementary material
Source: publisher site journal article supplement (https://oneecosystem.pensoft.net/article/download/suppl/5447726/)
Supplement: Supplementary file 1

Overview ES specific datasets.

|  | **Ecosystem service** | **Name of the map** | **Description** |
| --- | --- | --- | --- |
| 1 | Food production | Profile | Type of soil characteristic included in the soil map of Flanders |
|  |  | Substrate | Type of soil characteristic included in the soil map of Flanders |
|  |  | Variante | Type of soil characteristic included in the soil map of Flanders |
| 2 | Wood production | SBZ_Zones | Nature conservation zones - map from the Flemish government |
| 3 | Energy crops - agriculture | Makes use of maps from "Food production" | |
|  | Energy crops - forestry | Makes use of maps from "Wood production" | |
|  | Energy crops - nature management | No additional maps | |
| 4 | Water provisioning | Water abstractions | Locations of ground water abstractions and amount permitted - map from the Flemish government |
| 5 | Pollination | No additional maps | |
| 6 | Water infiltration | Zonation | Location sewer systems - map of the Flemish Environmental Agency |
| 7 | Water retention | No additional maps | |
| 8 | Carbon in biomass | Makes use of maps from "Wood production" | |
| 9 | Carbon in soil | Bemesting | Gemiddelde bemestingsinput (2004) per landbouwstreek |
|  |  | Peat | Type of soil characteristic included in the soil map of Flanders |
|  |  | Bodem_WRB | Afgeleid van de Bodemkaart van het Vlaamse Gewest volgens het internationale bodemclassificatiesysteem World Reference Base |
|  |  | Ferraris_Forest | Location of permanent old forest in Flanders (1771-1778) - map from the Flemish government |
|  |  | Slope | Slope derived from the from the digital elevation map of Flanders |
| 10 | Nitrogen and phosphorus in soil | No additional maps | |
| 11 | Nitrogen removal | LiterAanvoer | DSS specific map that estimates subsurface ground water flows |
|  |  | Zuiveringsgraad | DSS specific map which estimates the percentage of N that can be removed. |
| 12 | Erosion prevention | LS Factor | LS Factor map derived from the digital elevation map of Flanders |
| 13 | Air quality regulation | PM10 map | Modelled map of PM10 concentrations in Flanders - modelled in of the Flemish government |
| 14 | Noise attenuation | Adp | adminstrative parcels - map from the Flemish government |
|  |  | Noise map | Modelled map of trafic noise (db) along the main roads and railtracks - modelled |
|  |  | Roads and railtracks | Locations of roads and railtracks that are included in the noise map |
| 15 | Cooling effects from green infrastructure | No additional maps | |
| 16 | Recreation | Attractivity | DSS specific map that describes a baseline of attractivity of the landscape |
|  |  | Pylonen | Location of high voltage pylons |
|  |  | Windmolens | Locations of modern wind mills |
| 17 | Added value to houses due to a green environment | No additional maps | |
| 18 | Health effects of nature | No additional maps | |
